# Supplementary material for: Gallic acid-mitochondria targeting sequence-H3R9 induces mitochondria-targeted cytoprotection
Source: PubMed Central journal article supplement — Korean J Physiol Pharmacol. 2022 Jan 1;26(1):15–24. doi: 10.4196/kjpp.2022.26.1.15 (PMC8723982; doi:10.4196/kjpp.2022.26.1.15), 2022-01-01
Supplement: kjpp-26-1-15-supple.pdf [file kjpp-26-1-15-supple.pdf]

**Supplementary Table 1. Molecular weight and full sequence information of synthesized MTS peptides**

| Peptide name                              | Sequence                                                                    | MS expected | MS found |
|-------------------------------------------|-----------------------------------------------------------------------------|-------------|----------|
| K (gallic acid)                           | K (gallic acid)                                                             | 298.3       | 297.9    |
| MTS                                       | MLSLRQSIRFFKPATRTLCSRYLL-NH <sub>2</sub>                                    | 2,987.6     | 2,988    |
| MTS-H <sub>3</sub> R <sub>6</sub>         | MLSLRQSIRFFKPATRTLCSRYLLHHHRRRRRRR-NH <sub>2</sub>                          | 4,336.1     | 4,335    |
| MTS-H <sub>3</sub> R <sub>9</sub>         | MLSLRQSIRFFKPATRTLCSRYLLHHHRRRRRRRRR-NH <sub>2</sub>                        | 4,804.7     | 4,805    |
| GA-MTS-H <sub>3</sub> R <sub>6</sub>      | Gallic acidKMLSLRQSIRFFKPATRTLCSRYLLHHHRRRRRRR-NH <sub>2</sub>              | 4,616.4     | 4,616    |
| GA-MTS-H <sub>3</sub> R <sub>9</sub>      | Gallic acidKMLSLRQSIRFFKPATRTLCSRYLLHHHRRRRRRRRR-NH <sub>2</sub>            | 5,085.0     | 5,085    |
| FITC-K (gallic acid)                      | FITC-aca-K (gallic acid)                                                    | 800.9       | 800.3    |
| FITC-MTS                                  | FITC-aca-MLSLRQSIRFFKPATRTLCSRYLL-NH <sub>2</sub>                           | 3,490.2     | 3,490    |
| FITC-MTS-H <sub>3</sub> R <sub>6</sub>    | FITC-aca-MLSLRQSIRFFKPATRTLCSRYLLHHHRRRRRRR-NH <sub>2</sub>                 | 4,838.0     | 4,838    |
| FITC-MTS-H <sub>3</sub> R <sub>9</sub>    | FITC-aca-MLSLRQSIRFFKPATRTLCSRYLLHHHRRRRRRRRR-NH <sub>2</sub>               | 5,307.2     | 5,307    |
| FITC-GA-MTS-H <sub>3</sub> R <sub>6</sub> | FITC-aca-K(gallic acid)MLSLRQSIRFFKPATRTLCSRYLLHHHRRRRRRR-NH <sub>2</sub>   | 5,119.0     | 5,119    |
| FITC-GA-MTS-H <sub>3</sub> R <sub>9</sub> | FITC-aca-K(gallic acid)MLSLRQSIRFFKPATRTLCSRYLLHHHRRRRRRRRR-NH <sub>2</sub> | 5,587.5     | 5,586    |

MTS, mitochondria targeting sequence; GA, gallic acid; MTS, mitochondria targeting sequence.

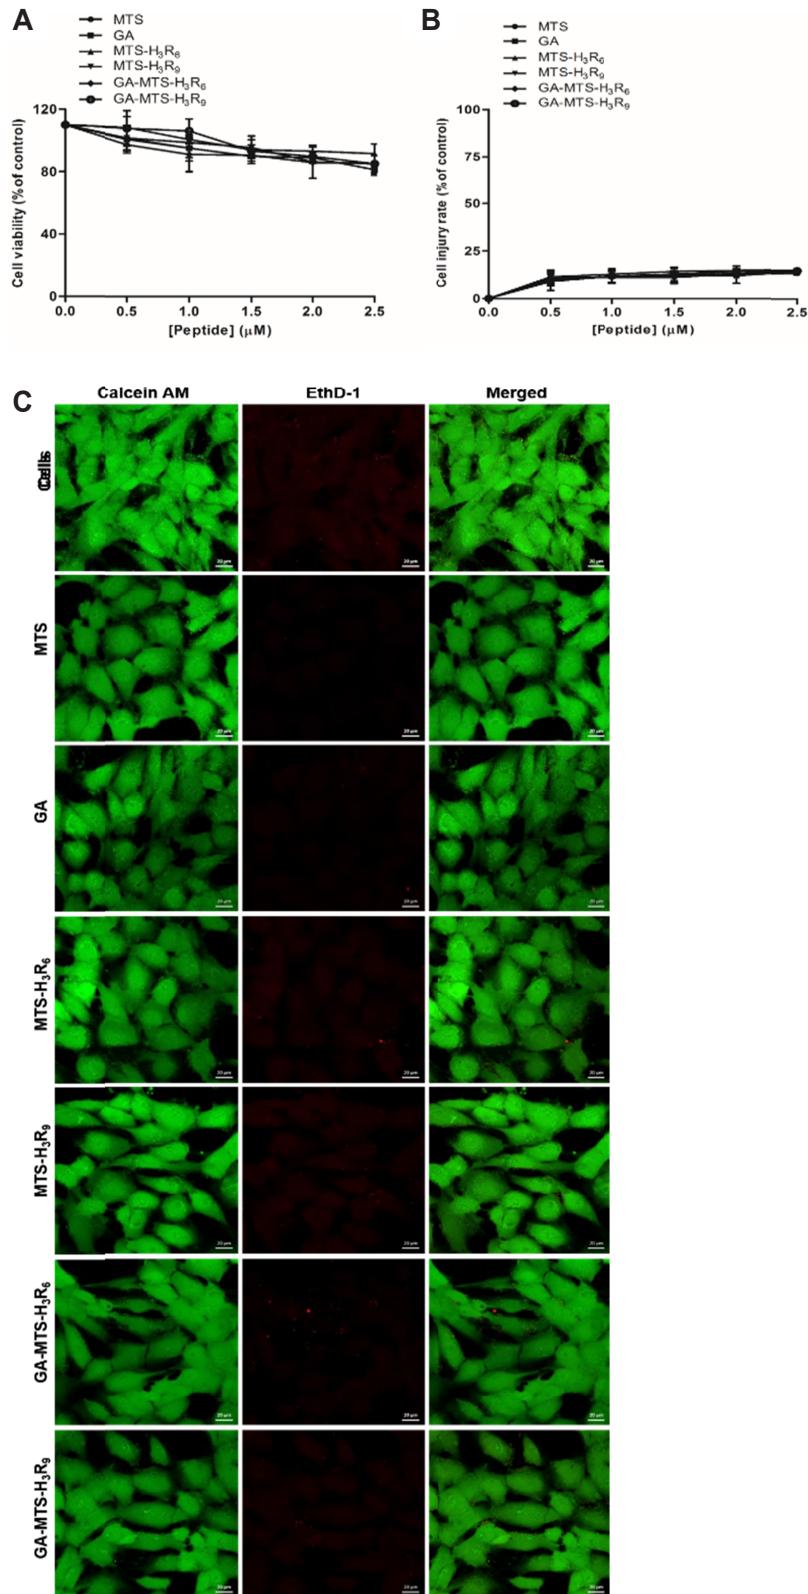

**Supplementary Fig. 1. Cell viability was evaluated using WST-1 and LDH assay.** (A) and (B) AC16 cells were exposed to various concentrations of GA, MTS, MTS-H<sub>3</sub>R<sub>6</sub>, MTS-H<sub>3</sub>R<sub>9</sub>, GA-MTS-H<sub>3</sub>R<sub>6</sub>, and GA-MTS-H<sub>3</sub>R<sub>9</sub> up to 2.5  $\mu\text{M}$  for 24 h. Panel (A) presents the results of the WST-1 assay and Panel (B) presents the results of LDH assay. (C) AC16 cells were the same conditions as those panel (A). The Cell viability was analyzed Live/dead assay with calcein AM (green) and EthD-1 (red). The cell fluorescence images were analyzed by confocal microscopy. Scale bar is 20  $\mu\text{m}$ . Data are indicated as the mean  $\pm$  SD (n = 3) of three independent experiments. LDH, lactate dehydrogenase; GA, gallic acid; MTS, mitochondria targeting sequence; calcein AM, calcein acetoxyethyl ester; EthD-1, ethidium homodimer-1.

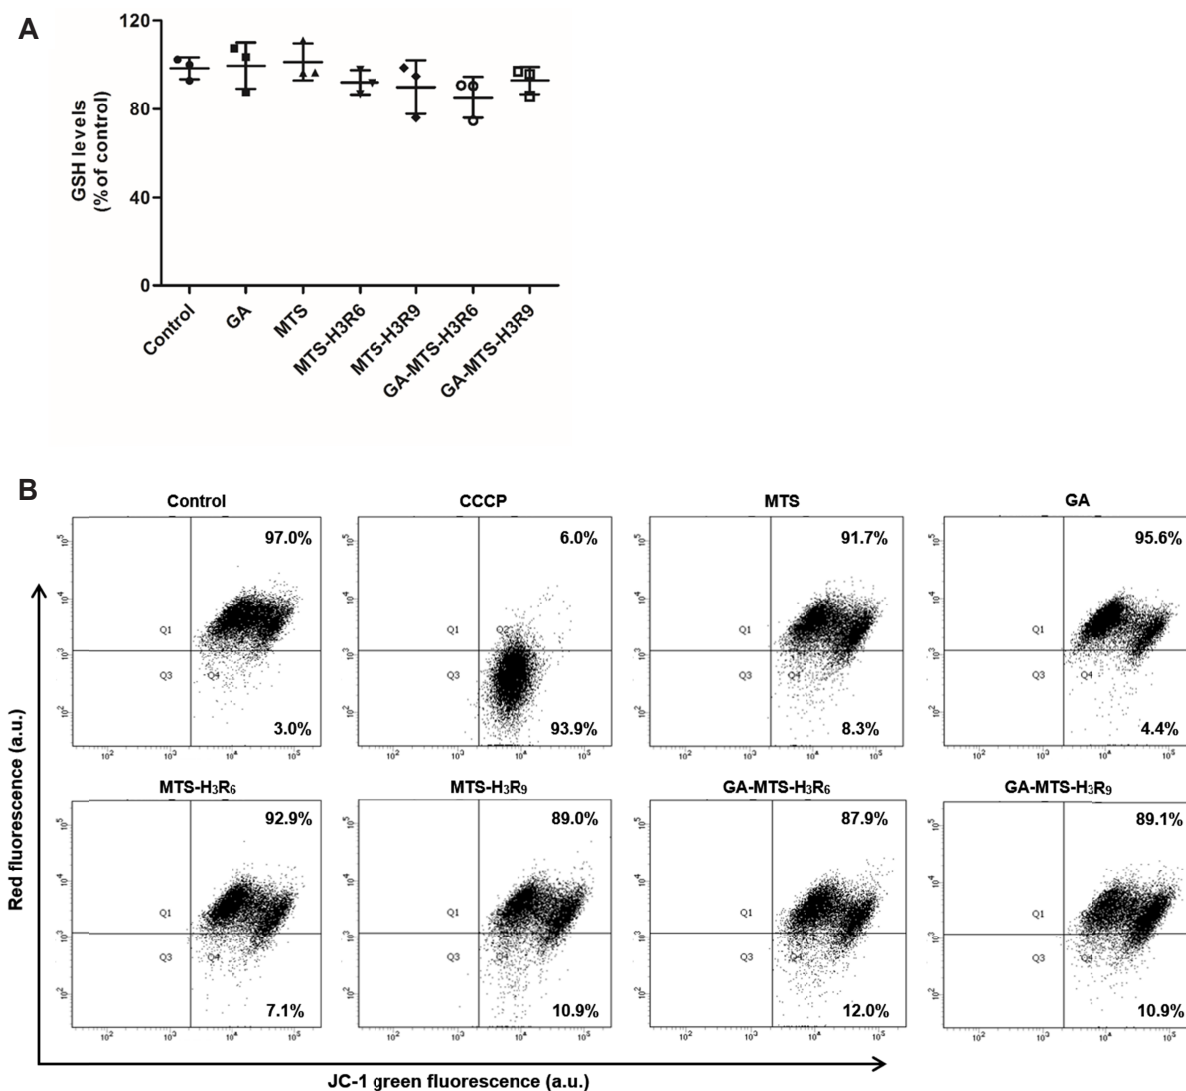

**Supplementary Fig. 2. ROS levels and mitochondrial membrane potential (MMP) with GA-MTS-H<sub>3</sub>R<sub>9</sub>.** (A) AC16 cells were exposed to 1  $\mu$ M GA, MTS, MTS-H<sub>3</sub>R<sub>6</sub>, MTS-H<sub>3</sub>R<sub>9</sub>, GA-MTS-H<sub>3</sub>R<sub>6</sub>, and GA-MTS-H<sub>3</sub>R<sub>9</sub> for 16 h. Intracellular ROS levels were assessed by GSH assay. (B) AC16 cells were treated using the same conditions as those in panel (A). The cells were added to 2  $\mu$ M JC-1 and then incubated for 20 min. MMP was determined by flow cytometry analysis. Data are indicated as the mean  $\pm$  SD ( $n = 3$ ) of three independent experiments. ROS, reactive oxygen species; GA, gallic acid; GSH, glutathione; MTS, mitochondria targeting sequence; CCCP, carbonyl cyanide 3-chlorophenylhydrazone.

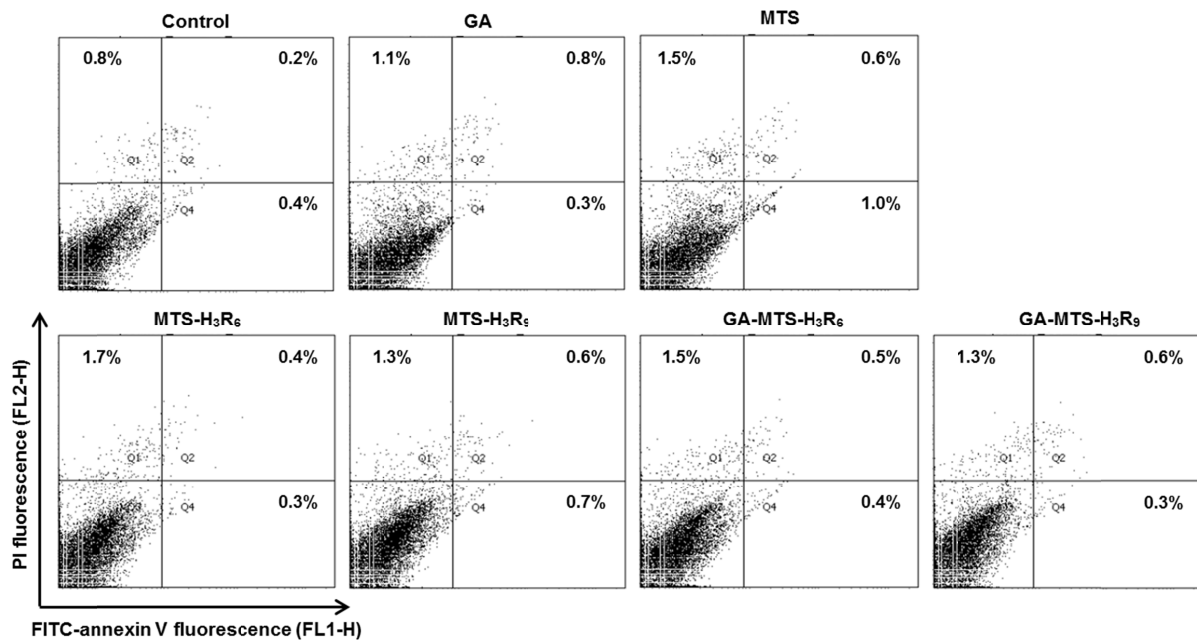

**Supplementary Fig. 3. Apoptosis by GA-MTS-H<sub>3</sub>R<sub>9</sub>.** AC16 cells were exposed to 1  $\mu$ M GA, MTS, MTS-H<sub>3</sub>R<sub>6</sub>, MTS-H<sub>3</sub>R<sub>9</sub>, GA-MTS-H<sub>3</sub>R<sub>6</sub>, and GA-MTS-H<sub>3</sub>R<sub>9</sub> for 24 h. Apoptosis levels for each group were measured by flow cytometry analysis after annexin V staining. Q1 shows necrotic cells. Q2 shows late apoptotic cells, Q3 shows intact cells, and Q4 shows early apoptotic cells. GA, gallic acid; MTS, mitochondria targeting sequence.
